# Supplementary material for: Genetic and environmental drivers of large-scale epigenetic variation in Thlaspi arvense
Source: bioRxiv or medRxiv preprint supplement (doi:10.1101/2022.03.16.484610), 2022-03-18

### mCG\_global

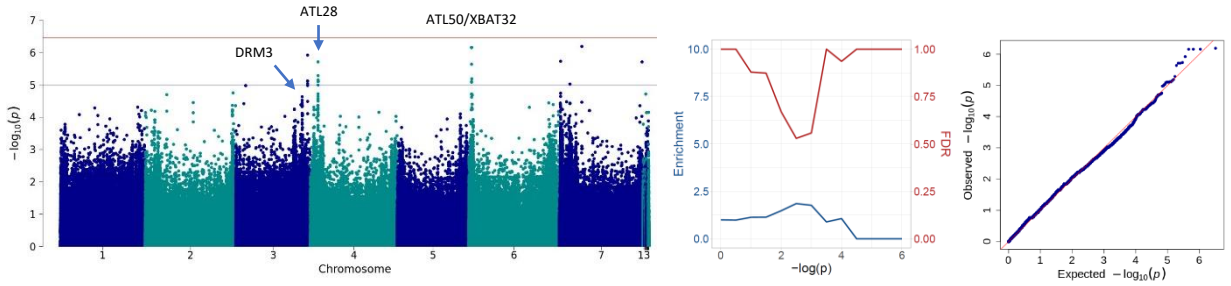

### mCG\_intergenic

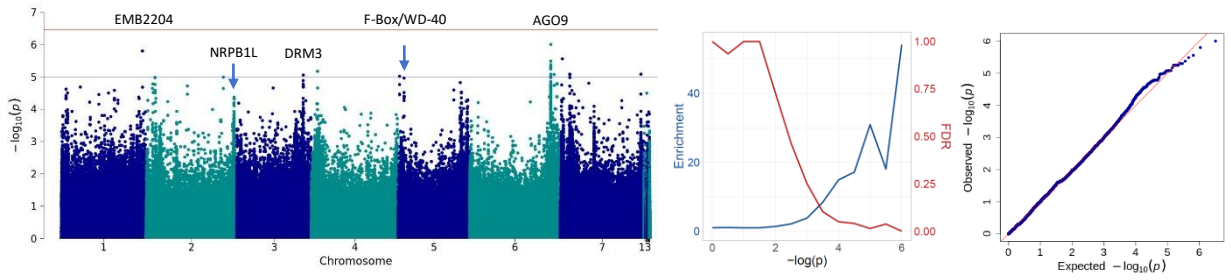

### CG\_GMB

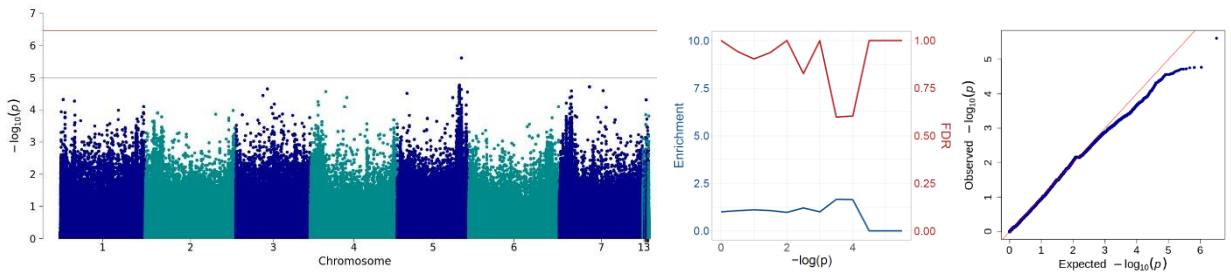

### CG\_GMB\_more5met

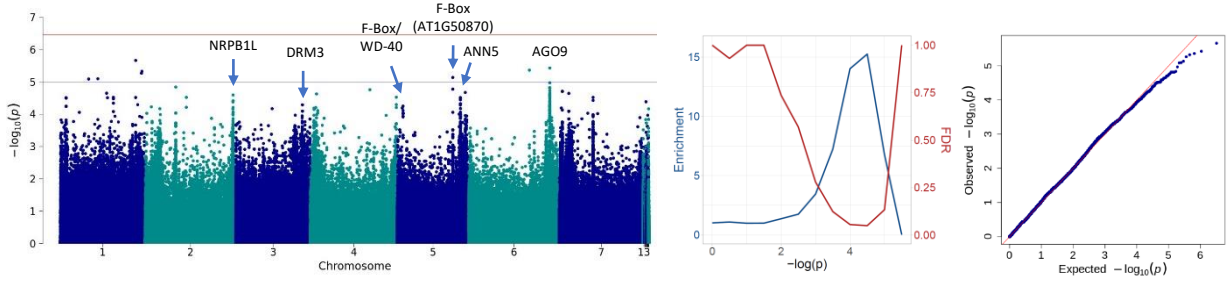

### mCG\_TEs

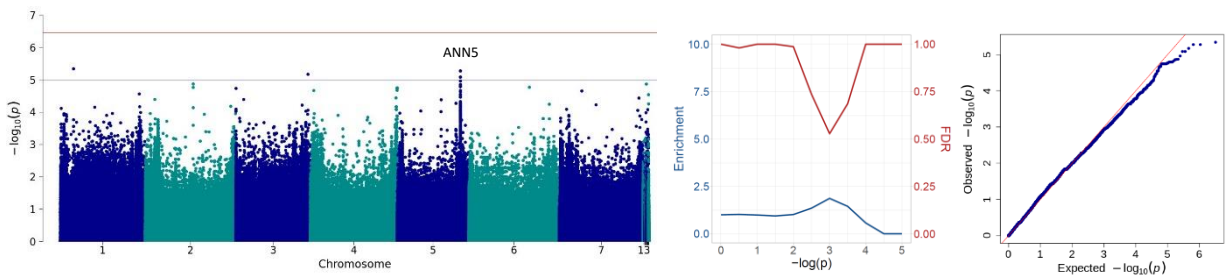

### mCG\_promoters

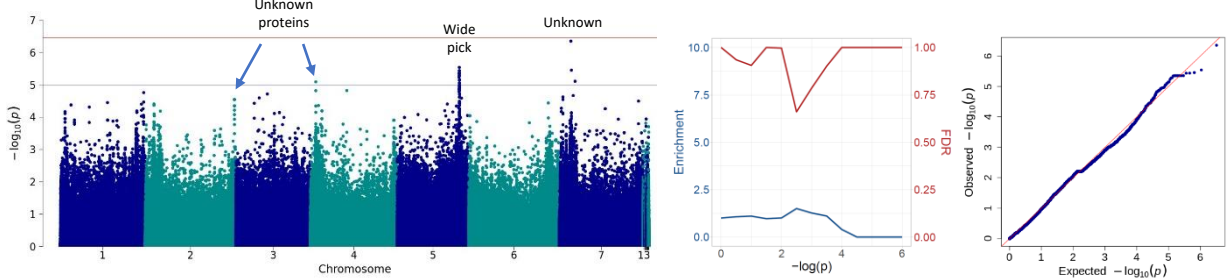

### mCHG\_global

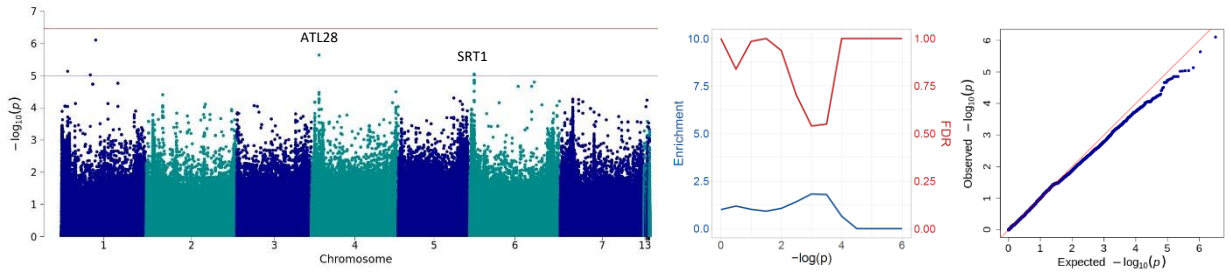

### mCHG\_intergenic

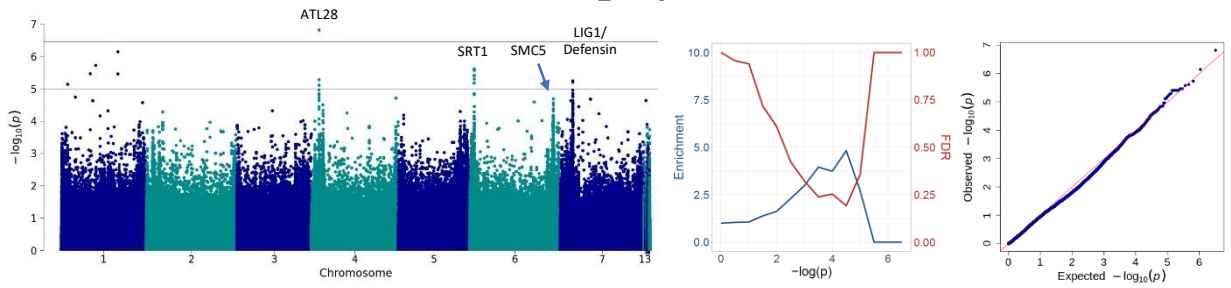

### CHG\_GMB

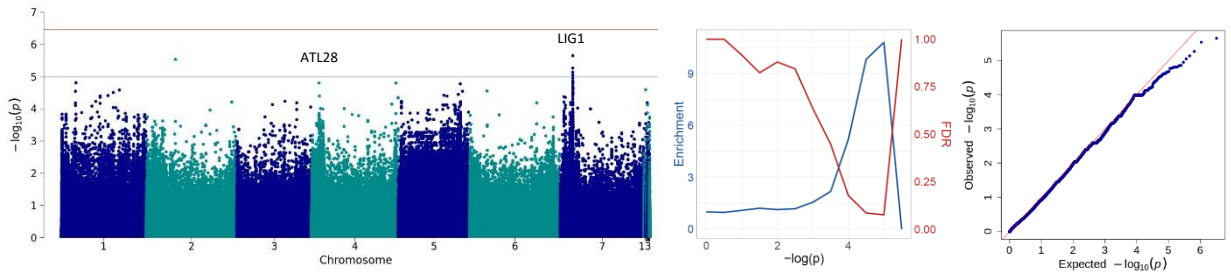

### mCHG\_GBM\_more5met

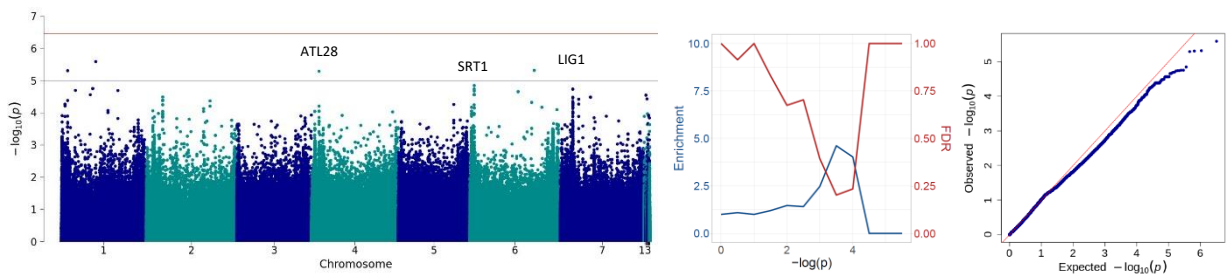

### mCHG\_TEs

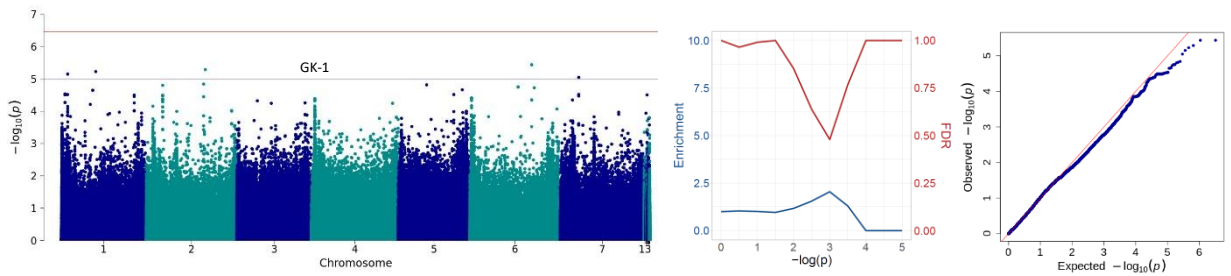

### mCHG\_promoters

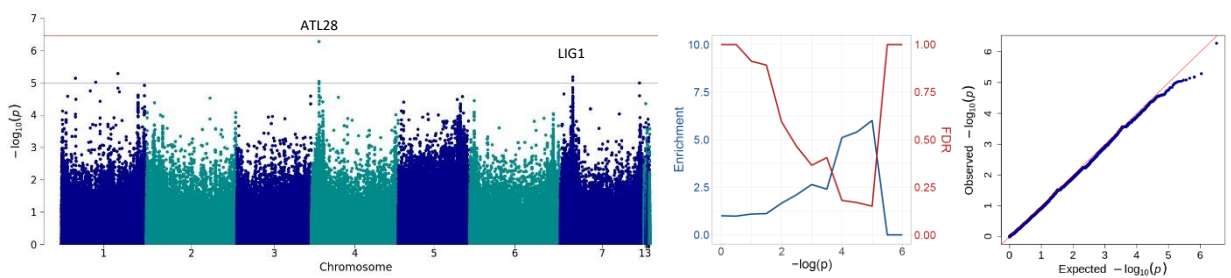

### mCHH\_global

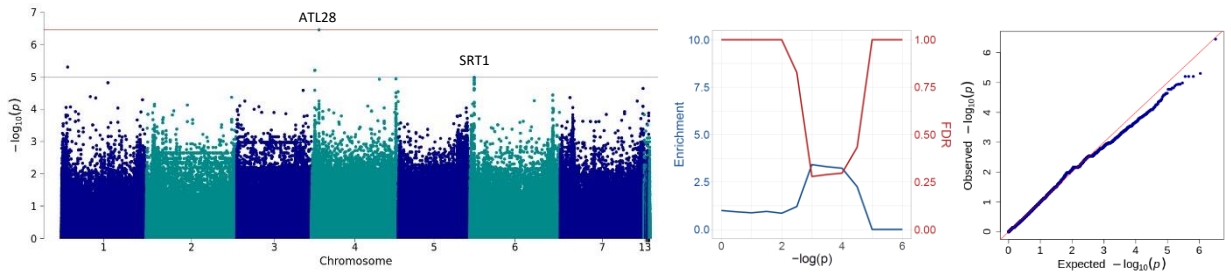

### mCHH\_intergenic

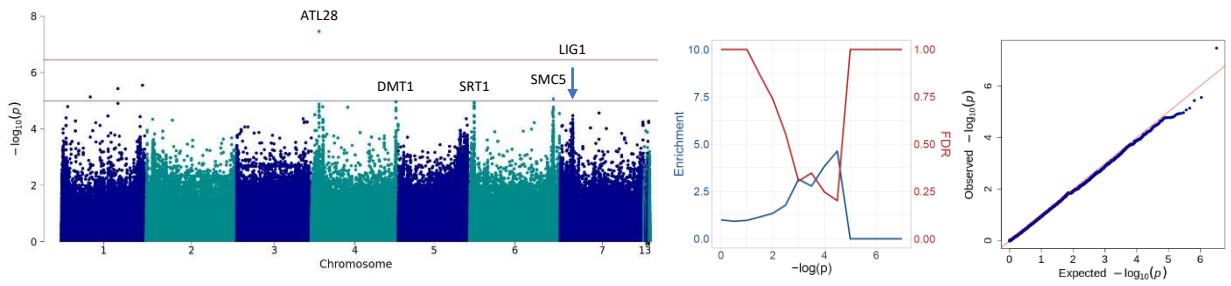

### CHH\_GMB

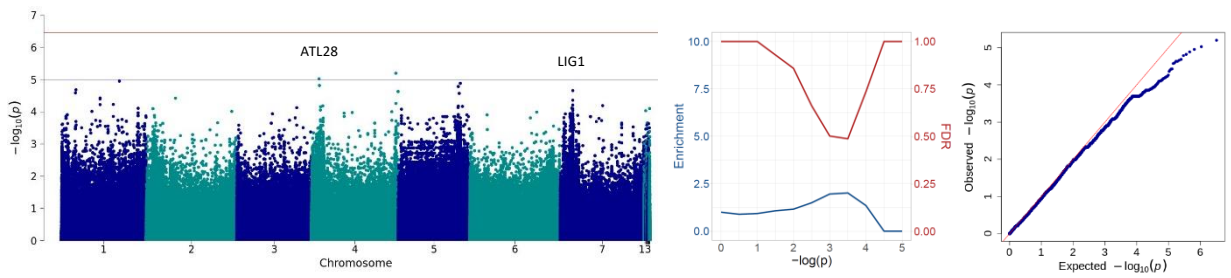

### mCHH\_GBM\_more5met

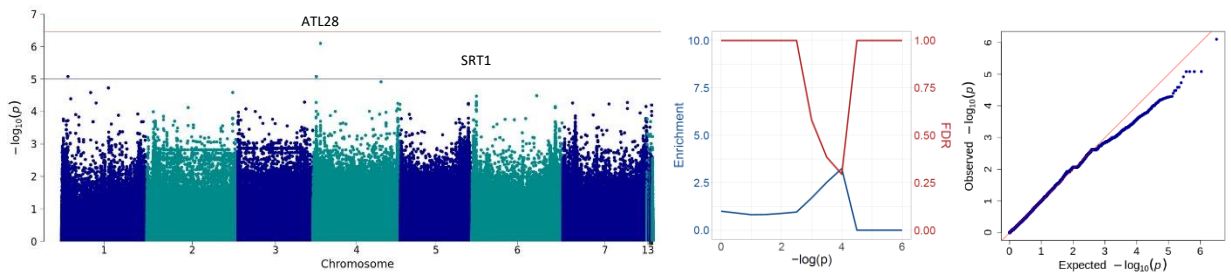

### mCHH\_TEs

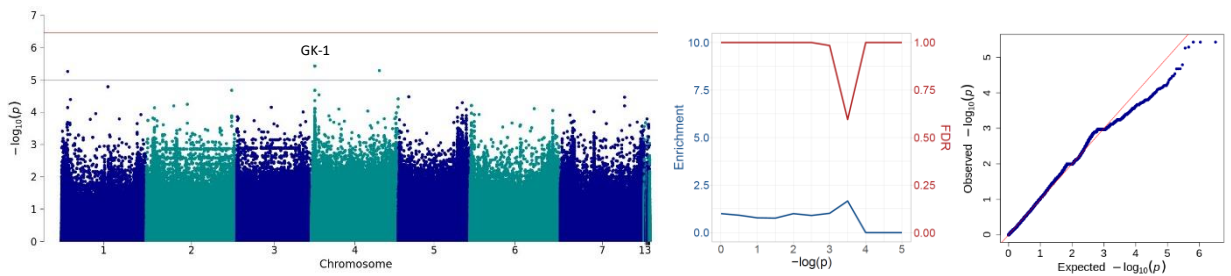

### mCHH\_promoters

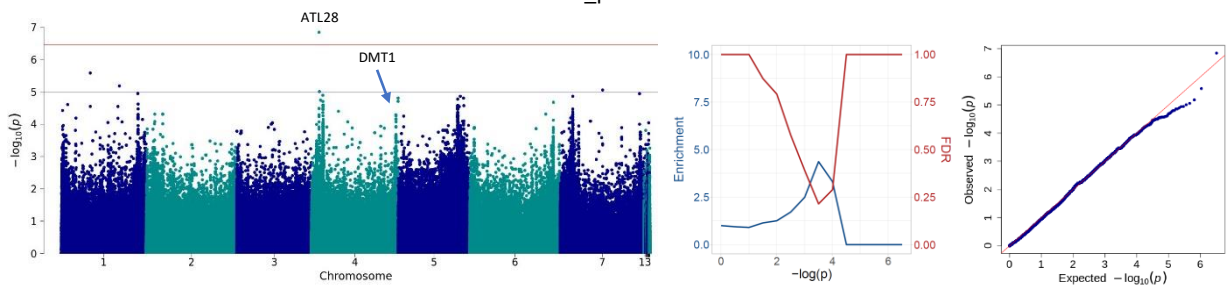

Supplement: Supplementary file [file media-3.pdf]
