# Supplementary material for: Genetic and environmental drivers of large-scale epigenetic variation in Thlaspi arvense
Source: bioRxiv or medRxiv preprint supplement (doi:10.1101/2022.03.16.484610), 2022-03-18

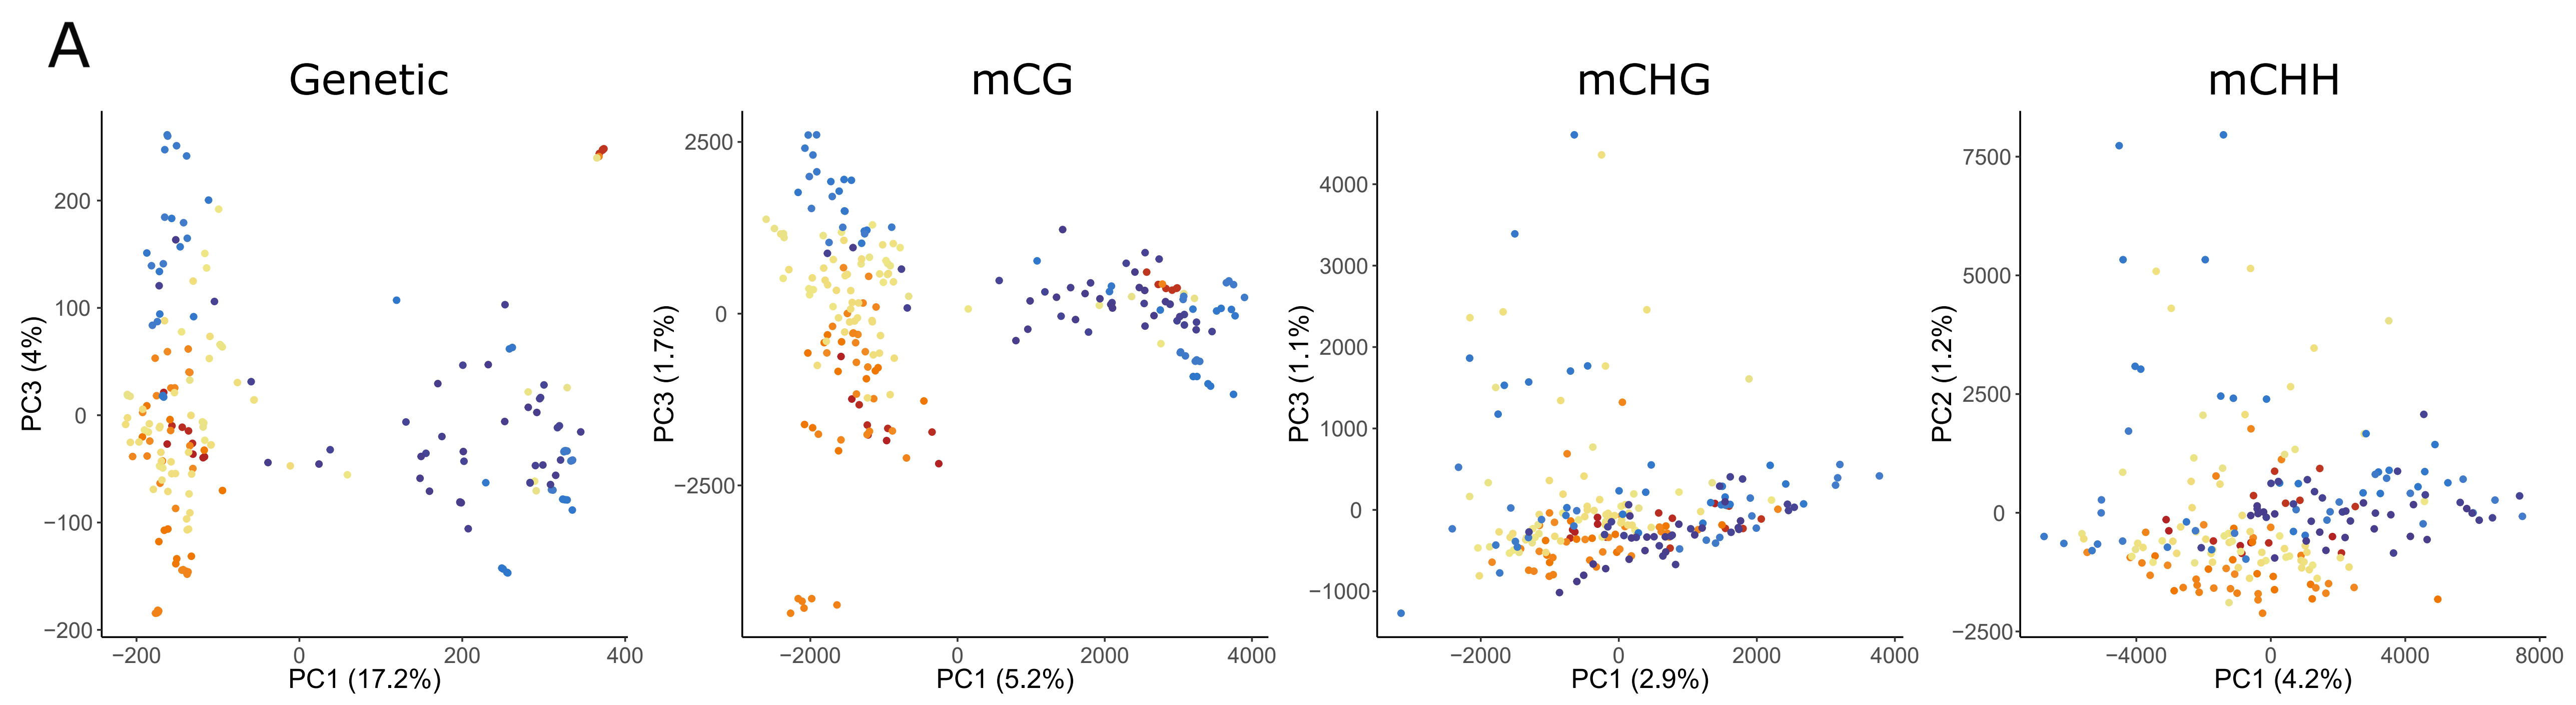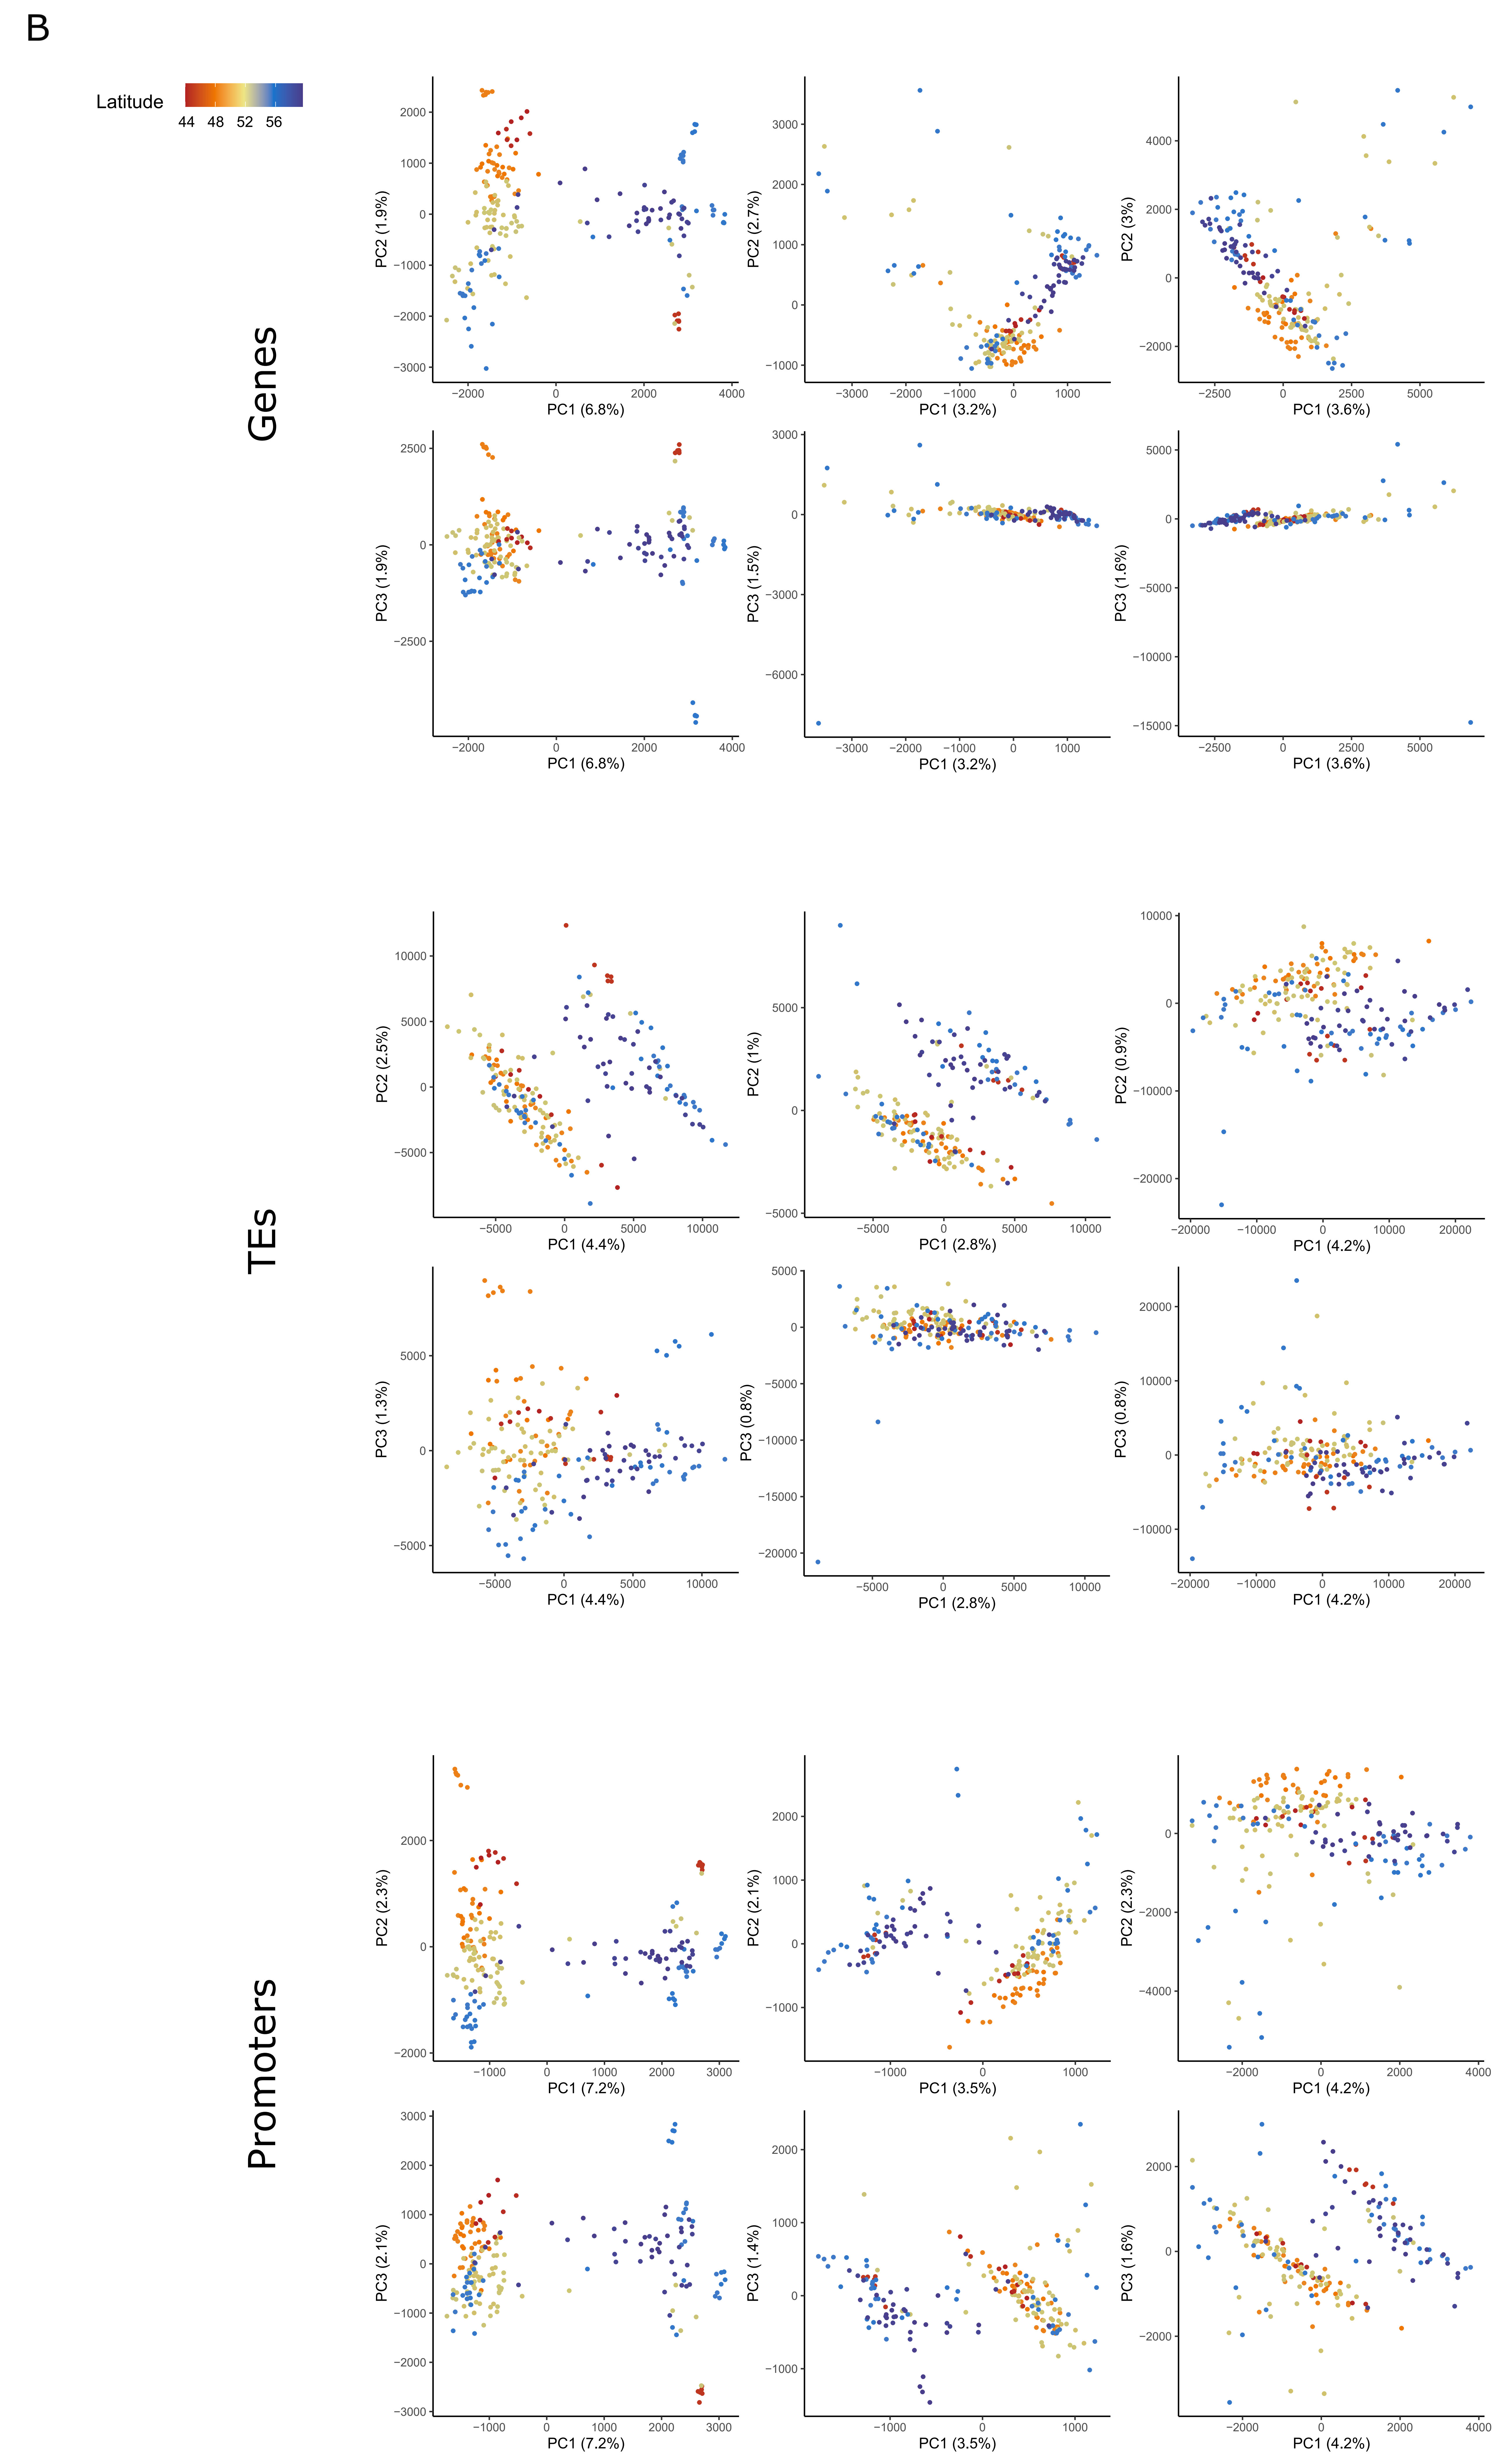

Supplement: Supplementary file [file media-1.pdf]
