# Supplementary material for: Genetic and environmental drivers of large-scale epigenetic variation in Thlaspi arvense
Source: bioRxiv or medRxiv preprint supplement (doi:10.1101/2022.03.16.484610), 2022-03-18
Supplement: Supplementary file [file media-5.pdf]

**S1 Table. Geographic locations of all *T. arvense* populations.**

| <b>Region</b>   | <b>Population</b> | <b>N° lines</b> | <b>Closest town</b> | <b>Latitude</b> | <b>Longitude</b> | <b>Altitude (m)</b> |
|-----------------|-------------------|-----------------|---------------------|-----------------|------------------|---------------------|
| France          | FR_01             | 5               | Les Rives           | 43.8508071      | 3.282875         | 743                 |
| France          | FR_02             | 4               | Mostuéjouls         | 44.2385639      | 3.1596174        | 848                 |
| France          | FR_03             | 6               | Miscon              | 44.6281220      | 5.523118         | 821                 |
| South Germany   | DE_01             | 6               | Tübingen            | 48.5402860      | 9.034686         | 458                 |
| South Germany   | DE_02             | 6               | Löffingen           | 47.8766732      | 8.427379         | 708                 |
| South Germany   | DE_03             | 6               | Braunlingen         | 47.9202121      | 8.434509         | 769                 |
| South Germany   | DE_04             | 6               | Balingen            | 48.2802594      | 8.837293         | 539                 |
| South Germany   | DE_06             | 6               | Hirrlingen          | 48.4121117      | 8.8835621        | 431                 |
| South Germany   | DE_07             | 6               | Empfingen           | 48.3843302      | 8.7295661        | 515                 |
| South Germany   | DE_08             | 4               | Wittershausen       | 48.3252288      | 8.6434947        | 536                 |
| The Netherlands | NL_01             | 6               | Wageningen          | 51.9550616      | 5.6372513        | 8                   |
| The Netherlands | NL_02             | 4               | Veenendaal          | 52.0403204      | 5.5523601        | 8                   |
| The Netherlands | NL_03             | 6               | Herwen              | 51.8861228      | 6.1316716        | 10                  |
| North Germany   | DE_09             | 6               | Halle               | 51.5138186      | 11.9201814       | 83                  |
| North Germany   | DE_10             | 6               | Schwittersdorf      | 51.5626351      | 11.7071825       | 187                 |
| North Germany   | DE_11             | 6               | Eisleben            | 51.5409550      | 11.5963349       | 221                 |
| North Germany   | DE_12             | 6               | Halle               | 51.5457637      | 11.9575064       | 90                  |
| North Germany   | DE_13             | 6               | Plötz               | 51.6362233      | 11.9366542       | 82                  |
| North Germany   | DE_14             | 6               | Rothen              | 51.7079562      | 12.0079172       | 88                  |
| North Germany   | DE_15             | 6               | Bossdorf            | 52.0151260      | 12.583979        | 151                 |
| North Germany   | DE_16             | 6               | Coswig              | 51.8852458      | 12.393296        | 55                  |
| South Sweden    | SE_01             | 6               | Lund                | 55.7224293      | 13.184996        | 48                  |
| South Sweden    | SE_02             | 6               | Lund                | 55.7316952      | 13.2524585       | 74                  |
| South Sweden    | SE_03             | 6               | Lund                | 55.7729103      | 13.2571215       | 21                  |
| South Sweden    | SE_04             | 6               | Eslöv               | 55.7483891      | 13.3845241       | 24                  |
| South Sweden    | SE_05             | 6               | Veberöd             | 55.6372295      | 13.5000471       | 34                  |
| South Sweden    | SE_06             | 6               | Vressel             | 55.6676921      | 13.6234294       | 20                  |
| South Sweden    | SE_07             | 6               | Vanstad             | 55.622051       | 13.835959        | 81                  |
| South Sweden    | SE_08             | 5               | Onslunda            | 55.6085961      | 14.0608974       | 108                 |
| Central Sweden  | SE_09             | 5               | Stockholm           | 59.3695897      | 17.9951086       | 9                   |
| Central Sweden  | SE_10             | 6               | Sollentuna          | 59.4340638      | 17.9218504       | 23                  |
| Central Sweden  | SE_11             | 6               | Rotebro             | 59.4773200      | 17.8533700       | 31                  |
| Central Sweden  | SE_12             | 5               | Uppsala             | 59.8191923      | 17.6535739       | 26                  |
| Central Sweden  | SE_13             | 6               | Uppsala             | 59.8447498      | 17.5101196       | 30                  |
| Central Sweden  | SE_14             | 6               | Uppsala             | 59.908915       | 17.599931        | 26                  |
| Central Sweden  | SE_15             | 6               | Sigtuna             | 59.652574       | 17.6884701       | 15                  |
