# Supplementary material for: Genetic and environmental drivers of large-scale epigenetic variation in Thlaspi arvense
Source: bioRxiv or medRxiv preprint supplement (doi:10.1101/2022.03.16.484610), 2022-03-18
Supplement: Supplementary file [file media-6.pdf]

**S3 Table. List of epiphenotypes, coverage corrections and transformations applied.**

| <b>Trait</b>     | <b>N° of outliers removed</b> | <b>Coverage correction</b> | <b>Transformation applied</b> |
|------------------|-------------------------------|----------------------------|-------------------------------|
| mCG_global       | 4                             | yes                        | none                          |
| mCHG_global      | 3                             | yes                        | none                          |
| mCHH_global      | 0                             | yes                        | none                          |
| CG_GBM           | 4                             | yes                        | INT                           |
| CHG_GBM          | 0                             | no                         | INT                           |
| CHH_GBM          | 0                             | no                         | INT                           |
| CG_intergenic    | 5                             | yes                        | none                          |
| CHG_intergenic   | 0                             | yes                        | gaussianize                   |
| CHH_intergenic   | 0                             | yes                        | gaussianize                   |
| mCG_TEs          | 2                             | no                         | gaussianise                   |
| mCHG_TEs         | 0                             | no                         | none                          |
| mCHH_TEs         | 0                             | no                         | none                          |
| mCG_prom         | 5                             | yes                        | none                          |
| mCHG_prom        | 1                             | yes                        | INT                           |
| mCHH_prom        | 1                             | no                         | INT                           |
| CG_GBM_more5met  | 4                             | yes                        | none                          |
| CHG_GBM_more5met | 0                             | yes                        | none                          |
| CHH_GBM_more5met | 0                             | yes                        | none                          |
